# Supplementary material for: High-order scheme for the source-sink term in a one-dimensional water temperature model
Source: PLoS One. 2017 Mar 6;12(3):e0173236. doi: 10.1371/journal.pone.0173236 (PMC5338824; doi:10.1371/journal.pone.0173236)
Supplement: S2 Table — (XLSX) [file pone.0173236.s002.xlsx]

## Sheet: Sheet1
		time（day）	average annual solar radiation(W/m2)(July to September)		time（day）	average annual water temperature (℃)(July to September)			time（day）	α(t)	time（day）	observed solar radiation (July to September)
		5.403	29.9683		5	29.2296			5	0.0322961	4.45476	891.986
July 1 corresponds to day=0		7.442	29.6723		7	28.2082			7	0.034635	8.90951	932.892
		9.072	30.1163		9	27.9869			9	0.0338967	13.7355	910.801
		11.926	31.0042		11	28.257			11	0.0345624	18.3759	940.07
		13.149	32.5581		13	29.2056			13	0.0339158	24.1299	929.617
		15.188	33.2981		15	29.5102			15	0.0355433	29.6984	921.254
		17.226	32.8541		17	28.8803			17	0.0358342	35.2668	942.16
		20.08	34.1121		20	29.8481			20	0.036	38.6079	1013.24
		23.341	32.7801		23	28.8153			23	0.0367342	41.3921	1052.96
		27.418	31.7442		27	28.4755			27	0.0351158	43.9907	1103.14
		29.864	30.9302		30	28.4529			30	0.0330426	47.8886	1058.05
		31.902	30.4123		32	28.5739			32	0.0335267	53.0858	1084.77
		35.163	31.3742		35	30.6008			35	0.0310961	55.4988	1122.86
		39.24	32.3362		39	33.4285			39	0.0304708	57.7262	1188.85
		42.909	32.8541		43	36.1863			43	0.0285993	61.9954	1207.67
		45.763	31.8922		46	36.831			46	0.0272761
		46.986	30.7082		47	36.0063			47	0.026865
		46.986	29.5983		47.5	32.3401			47.5	0.0288295
		48.616	28.4884		48.5	30.6329			48.5	0.0292948
		51.878	28.1924		52	28.704			52	0.0309386
		55.139	29.3023		55	28.58			55	0.0322961
		57.178	29.3023		57	27.8564			57	0.033135
		57.993	30.1163		58	28.2958			58	0.0335267
		58.808	31.1522		59	28.9496			59	0.0338967
		60.847	29.1543
		63.293	28.0444
